# Supplementary material for: Macroscopic weavable fibers of carbon nanotubes with giant thermoelectric power factor
Source: PubMed Central journal article supplement (PMC8363648; doi:10.1038/s41467-021-25208-z), 2021-08-13
Supplement: 41467_2021_25208_MOESM3_ESM.pdf [file 41467_2021_25208_MOESM3_ESM.pdf]

## **Description of Additional Supplementary Files**

Supplementary Movie 1:

Demonstration of powering an LED using a thermoelectric power generator based on carbon nanotube threads
